# Supplementary material for: Retained primary teeth in STAT3 hyper-IgE syndrome: early intervention in childhood is essential
Source: Springer Nature journal article supplement (doi:10.1186/s13023-020-01516-3), 2020-09-10
Supplement: MOESM1 [file 13023_2020_1516_MOESM1_ESM.pdf › 13023_2020_1516_MOESM1_ESM.pdf]

## Supplementary Table 1

| ID  | Age [years] | Gender | Elevated serum IgE | Eczema | Recurrent bacterial skin infections | Recurrent sinusitis/ otitis | Recurrent Pneumonia | Bronchi-ectasis | Muco-cutaneous candidiasis | Other associated skeletal findings | Heterozygous STAT3 mutation |
|-----|-------------|--------|--------------------|--------|-------------------------------------|-----------------------------|---------------------|-----------------|----------------------------|------------------------------------|-----------------------------|
| #1  | 37          | female | yes                | yes    | yes                                 | yes                         | yes                 | yes             | yes                        | yes                                | c.1144C>T; p.R382W          |
| #2  | 5           | male   | yes                | yes    | yes                                 | yes                         | no                  | no              | yes                        | yes                                | c.1144C>T; p.R382W          |
| #3  | 17          | male   | yes                | yes    | yes                                 | yes                         | yes                 | yes             | yes                        | yes                                | c.1145G>A; p.R382Q          |
| #4  | 12          | female | yes                | yes    | yes                                 | yes                         | yes                 | yes             | yes                        | yes                                | c.1909G>A; p.V637M          |
| #5  | 32          | male   | yes                | yes    | yes                                 | yes                         | yes                 | yes             | yes                        | yes                                | c.1152T>A; p.F348L          |
| #6  | 16          | female | yes                | yes    | yes                                 | yes                         | yes                 | yes             | no                         | no                                 | c.1145G>A; p.R382Q          |
| #7  | 19          | female | yes                | yes    | yes                                 | yes                         | yes                 | yes             | no                         | no                                 | c.2114 A>C; p.Y705C         |
| #8  | 23          | female | yes                | yes    | yes                                 | yes                         | yes                 | yes             | no                         | yes                                | c.1406A>G; p.Q469R          |
| #9  | 24          | female | yes                | yes    | yes                                 | yes                         | yes                 | no              | yes                        | yes                                | c.1145G>A; p.R382Q          |
| #10 | 7           | male   | yes                | yes    | no                                  | yes                         | yes                 | no              | no                         | yes                                | c.1145G>A; p.R382Q          |
| #11 | 9           | male   | yes                | yes    | yes                                 | yes                         | no                  | no              | yes                        | yes                                | c.1145G>A; p.R382Q          |
| #12 | 8           | male   | yes                | yes    | yes                                 | yes                         | yes                 | no              | yes                        | yes                                | c.1144C>T; p.R382W          |
| #13 | 48          | male   | yes                | yes    | yes                                 | yes                         | yes                 | no              | yes                        | yes                                | c.1144C>T; p.R382W          |
